# Supplementary material for: Temperature invariant lifetime based luminescent manometer on Mn4+ ions
Source: Royal Society of Chemistry journal article supplement (doi:10.1039/d3tc00911d), 2023-01-01
Supplement: d3tc00911d1.pdf [file d3tc00911d1.pdf]

## Supporting Information

### Temperature invariant lifetime based luminescent manometer on Mn<sup>4+</sup> ions

M. Pieprz<sup>1</sup>, M. Runowski,<sup>2,3</sup> P. Woźny,<sup>2</sup> J. Xue,<sup>4</sup> L. Marciniak<sup>1</sup>

<sup>1</sup> Institute of Low Temperature and Structure Research, Polish Academy of Sciences,

Okólna 2, 50-422 Wrocław, Poland

<sup>2</sup> Adam Mickiewicz University, Faculty of Chemistry, Uniwersytetu Poznańskiego 8, 61-614 Poznań, Poland

<sup>3</sup> Departamento de Física, Instituto de Materiales y Nanotecnología, IUdEA & MALTA Consolider Team,  
Universidad de La Laguna, Apdo. Correos 456, E-38200 San Cristóbal de La Laguna, Santa Cruz de Tenerife,

Spain

<sup>4</sup> Department of Physics, Pukyong National University, Busan 608-737, Republic of Korea

\* corresponding author: [l.marciniak@intibs.pl](mailto:l.marciniak@intibs.pl);

**KEYWORDS** luminescent manometer, pressure sensor, Mn<sup>4+</sup>, average lifetime, luminescence  
intensity ratio, optical manometry

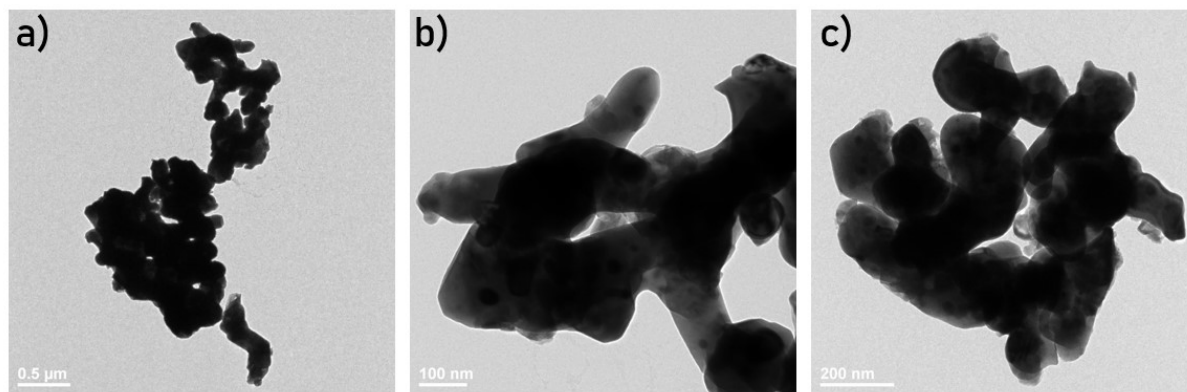

**Figure S1.** The representative TEM images of SrGdAlO<sub>4</sub>: 0.2% Mn<sup>4+</sup>

**Table S1.** Estimated energies (peak centroids) of the main Raman modes at low pressure, and the corresponding pressure shift rates of the corresponding bands for the SrGdAlO<sub>4</sub> material.

| Peak centroid at ambient pressure (cm <sup>-1</sup> ) | Shift rate (cm <sup>-1</sup> /GPa) |
|-------------------------------------------------------|------------------------------------|
|-------------------------------------------------------|------------------------------------|

---

|               |                 |
|---------------|-----------------|
| $\approx 230$ | $3.58 \pm 0.25$ |
| $\approx 370$ | $3.71 \pm 0.09$ |
| $\approx 440$ | $3.69 \pm 0.37$ |
| $\approx 575$ | $3.67 \pm 0.31$ |
| $\approx 740$ | $4.51 \pm 0.17$ |

---

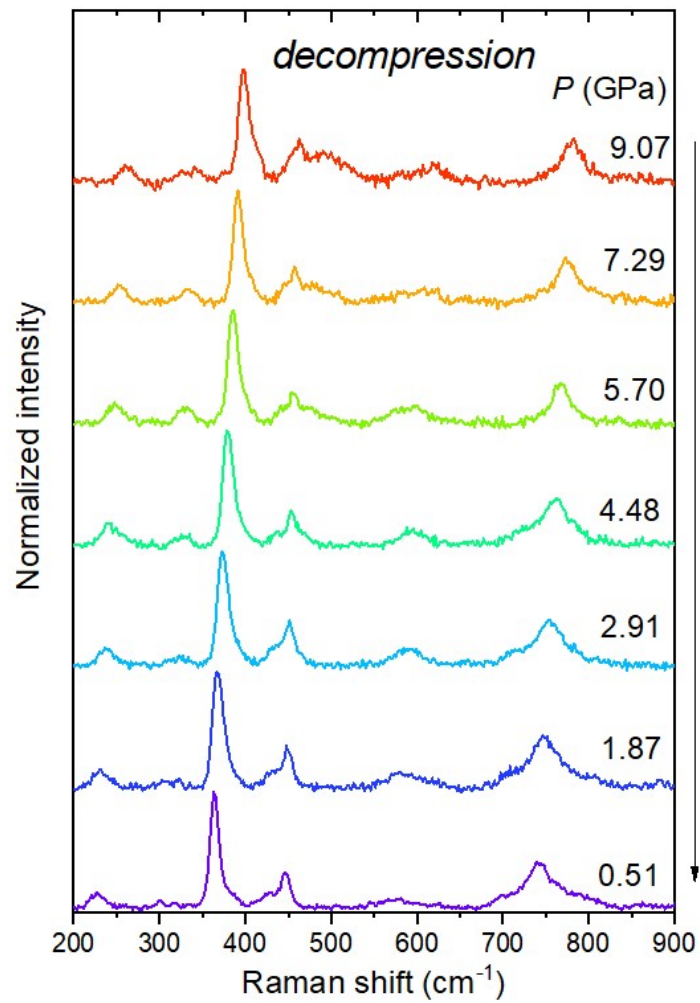

**Figure S2.** Normalized Raman spectra for the SrGdAlO<sub>4</sub> material measured for different pressure values, during the decompression cycle.

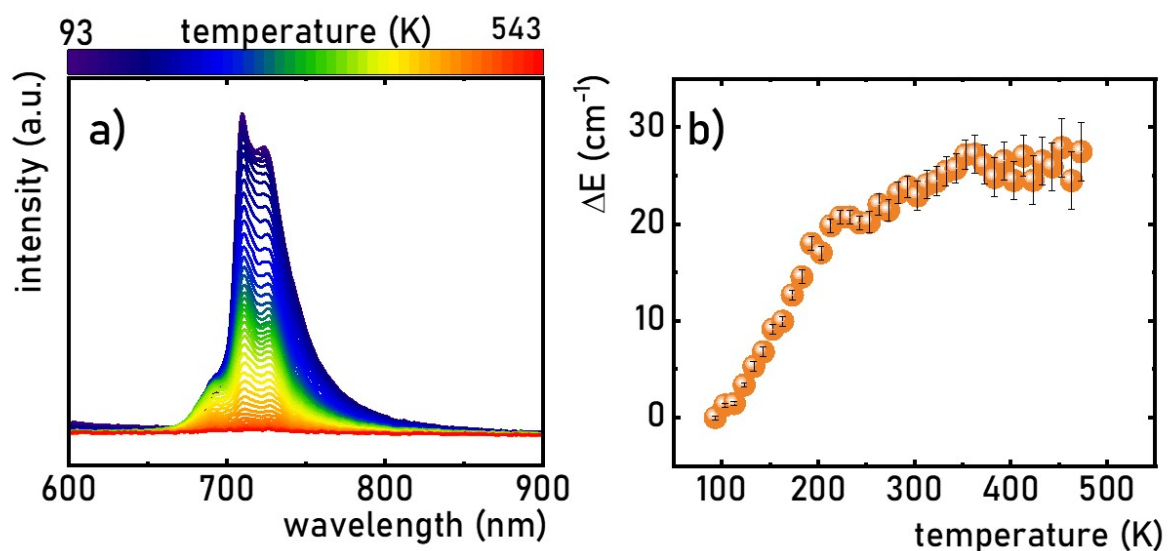

**Figure S3.** Emission spectra of SrGdAlO<sub>4</sub>:0.2%Mn<sup>4+</sup> measured as a function of temperature -a); change of the energy of the emission band maxima as a function of temperature-b).

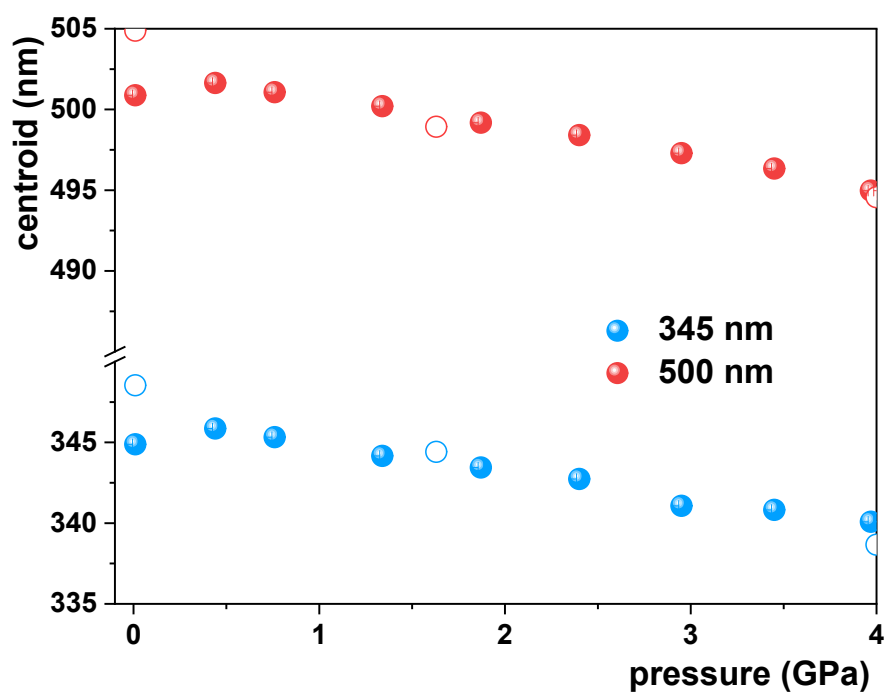

**Figure S4.** The change of the excitation band centroid of Mn<sup>4+</sup> ion in SrGdAlO<sub>4</sub>:0.2%Mn<sup>4+</sup> as a function of pressure during the compression (full points) and decompression (open points).

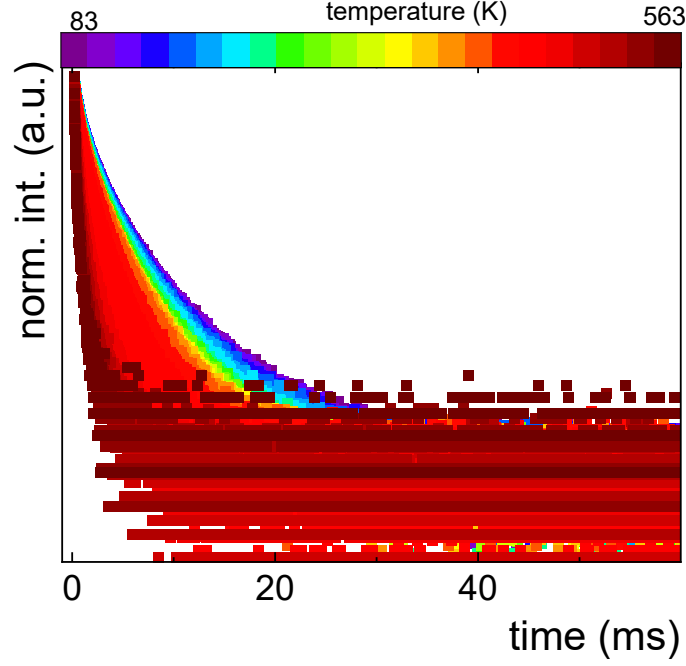

**Figure S5.** The luminescence decay profile of the Mn<sup>4+</sup> ion emission for the SrGdAlO<sub>4</sub>:0.2%Mn<sup>4+</sup> measured as a function of temperature.

The crystal field parameter  $Dq$  and Racah parameters for Mn<sup>4+</sup> of 3d<sup>3</sup> electron configuration were defined based on experimental excitation and emission spectra data. For this purpose, the energies of  ${}^4A_2 \rightarrow {}^4T_1$  and  ${}^4A_2 \rightarrow {}^4T_2$  bands obtained from excitation spectra and zero phonon line (R-line) of  ${}^2E \rightarrow {}^4A_2$  band from emission spectra. The empirical equations take the following form:

$$E({}^4A_2 \rightarrow {}^4T_2) = 10Dq \quad (\text{Eq. S1})$$

$$\frac{Dq}{B} = \frac{15\left(\frac{\Delta E}{Dq} - 8\right)}{\left(\frac{\Delta E}{Dq}\right)^2 - 10 \cdot \frac{\Delta E}{Dq}} \quad (\text{Eq. S2})$$

$$\frac{E({}^2E \rightarrow {}^4A_2)}{B} = \frac{3.05 \cdot C}{B} + 7.90 - \frac{1.80 \cdot B}{Dq} \quad (\text{Eq. S3})$$

where  $\Delta E$  was predefined as:

$$\Delta E = E({}^4A_2 \rightarrow {}^4T_1) - E({}^4A_2 \rightarrow {}^4T_2) \quad (\text{Eq. S4})$$

The average lifetime of the excited states were calculated with the equation Eq. S5:

$$\tau_{avr} = \frac{A_1\tau_1^2 + A_2\tau_2^2}{A_1\tau_1 + A_2\tau_2} \quad (\text{Eq. S5})$$

where:  $\tau_1, \tau_2$  are the decay parameters and  $A_1, A_2$  are amplitudes of the bi-exponential function:

$$I(t) = I_0 + A_1 \cdot \exp\left(-\frac{t}{\tau_1}\right) + A_2 \cdot \exp\left(-\frac{t}{\tau_2}\right) \quad (\text{Eq. S6})$$

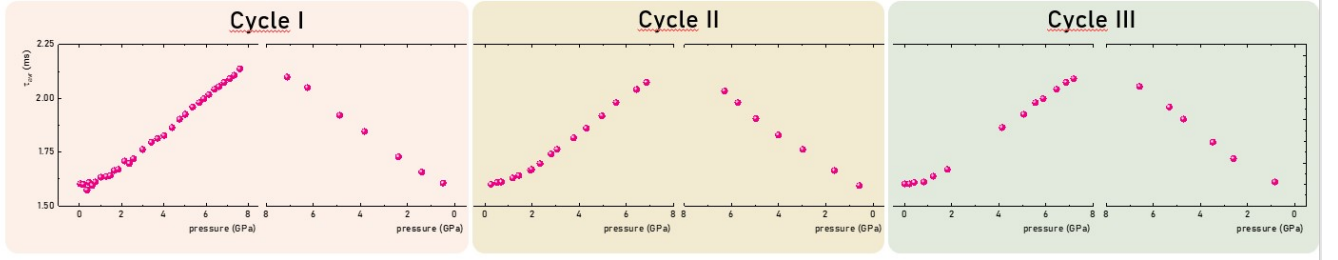

**Figure S6.** The room temperature  $\tau_{avr}$  of  $\text{SrGdAlO}_4:0.2\%\text{Mn}^{4+}$  measured within three compression and decompression cycles

The pressure determination uncertainty of the lifetime-based luminescence manometer was determined as follows:

$$\delta p = \frac{1}{S_{R,P}} \frac{\delta \tau_{avr}}{\tau_{avr}} \quad (\text{Eq. S7})$$

where  $\delta \tau_{avr}/\tau_{avr}$  is the uncertainty in the determination of  $\tau_{avr}$  (determined as a standard deviation in 30 measurements of  $\tau_{avr}$ ).

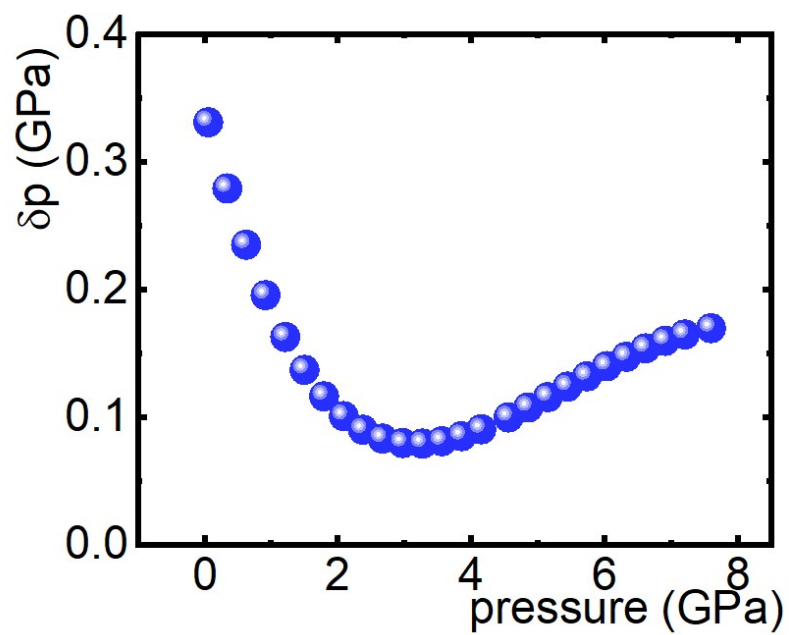

**Figure S7.** The pressure determination uncertainty as a function of applied pressure for the lifetime based luminescent manometer in  $\text{SrGdAlO}_4:0.2\%\text{Mn}^{4+}$ .
